# 1 Reference-free multiplexed single-cell sequencing identifies 2 genetic modifiers of the human immune response

3 George C. Hartoularos<sup>1,2,3</sup>, Yichen Si<sup>\*,4</sup>, Fan Zhang<sup>\*,5</sup>, Pooja Kathail<sup>2,3,6</sup>, David S. Lee<sup>2,3</sup>, Anton  
4 Ogorodnikov<sup>2,3</sup>, Yang Sun<sup>2,3</sup>, Yun S. Song<sup>7,8</sup>, Hyun Min Kang<sup>4</sup>, Chun Jimmie Ye<sup>2,3,9,10,11,12,13</sup>

5

6 <sup>1</sup> Graduate Program in Biological and Medical Informatics, University of California, San Francisco, CA 94158, USA

7 <sup>2</sup> Division of Rheumatology, Department of Medicine, University of California, San Francisco, CA 94143, USA

8 <sup>3</sup> Institute for Human Genetics, University of California, San Francisco, CA 94143, USA

9 <sup>4</sup> Department of Biostatistics, School of Public Health, University of Michigan, MI 48109, USA

10 <sup>5</sup> Department of Computational Medicine and Bioinformatics, University of Michigan Medical School, MI 48109, USA

11 <sup>6</sup> Center for Computational Biology, University of California, Berkeley, CA 94720, USA

12 <sup>7</sup> Department of Statistics, University of California, Berkeley, CA 94720, USA

13 <sup>8</sup> Computer Science Division, University of California, Berkeley, CA 94720, USA

14 <sup>9</sup> Parker Institute for Cancer Immunotherapy, San Francisco, CA 94143, USA

15 <sup>10</sup> Bakar Computational Health Sciences Institute, University of California, San Francisco, CA 94143, USA

16 <sup>11</sup> Department of Medicine, University of California, San Francisco, CA 94143, USA

17 <sup>12</sup> Chan Zuckerberg Biohub, San Francisco, CA 94158, USA

18 <sup>13</sup> Department of Epidemiology and Biostatistics, University of California, San Francisco, CA 94143, USA

19 \* These authors contributed equally

20 Contact: [george.hartoularos@ucsf.edu](mailto:george.hartoularos@ucsf.edu), [jimmie.ye@ucsf.edu](mailto:jimmie.ye@ucsf.edu)

## 21 Abstract

22           Multiplexed single-cell sequencing (mux-seq) using single-nucleotide polymorphisms  
23 (SNPs) has emerged as an efficient approach to perform expression quantitative trait loci (eQTL)  
24 studies that map interactions between genetic variants and cell types, cell states, or experimental  
25 perturbations. Here we introduce the *clue* framework, a novel approach to encode mux-seq  
26 experiments that eliminates the need for reference genotypes and experimental barcoding. The  
27 *clue* framework is made possible by the development of *freemuxlet*, an algorithm that clusters  
28 cells based on SNPs called from single-cell RNA-seq or ATAC-seq data. To demonstrate the  
29 feasibility of *clue*, we profiled the surface protein and RNA abundances of peripheral blood  
30 mononuclear cells from 64 individuals, stimulated with 5 distinct extracellular stimuli — all within  
31 a single day. Our analysis of the demultiplexed data identified rare immune cell types and cell  
32 type-specific responses to interferon and toll-like receptor stimulation. Furthermore, by integrating  
33 genotyping data, we mapped response eQTLs specific to certain cell types. These findings  
34 showcase the potential and scalability of the *clue* framework for reference-free multiplexed single-  
35 cell sequencing studies.

36

## 37 Introduction

38           Understanding the genetic architecture of gene expression remains a critical challenge in  
39 human genetics. The overwhelming enrichment of disease-associated variants in the cis-  
40 regulatory regions of the genome points to the crucial role of transcription regulation in conferring  
41 disease risk<sup>1,2</sup>. Although expression quantitative trait loci (eQTL) studies in bulk tissues have  
42 identified numerous genetic variants associated with proximal gene expression, their enrichment  
43 for disease-associated variants remains modest<sup>3,4</sup>. This might be because disease-causing  
44 variants affect enhancer rather than promoter activities, modifying gene expression in particular  
45 cell types, cell states, or in response to specific environmental factors. In such situations, it can  
46 be challenging to identify eQTLs that interact with cellular states using bulk gene expression  
47 analysis, as the composition of cell types and the molecular states of cells within the same type  
48 may vary between individuals, and functionally important cell populations could be rare<sup>5</sup>. One  
49 method for mapping eQTL interactions is to sort and perturb specific cell types and then profile  
50 their gene expression. However, this approach is cost prohibitive for large population cohorts, can  
51 be susceptible to experimental confounding, and fails to capture heterogeneity within sorted  
52 populations. Consequently, there is a need for more efficient and unbiased methods for mapping  
53 eQTL interactions in the human genome.

54           Multiplexed single-cell sequencing (mux-seq) using single-nucleotide polymorphisms  
55 (SNPs) as sample barcodes has enabled population-scaled studies for assessing the impact of  
56 case-control status<sup>6</sup>, experimental perturbations<sup>7</sup>, and genetic variants on gene expression across  
57 single cells<sup>8</sup>. Recently, our analyses of mux-seq data revealed that cell type-specific *cis*-eQTLs  
58 are more enriched for disease associations than those shared across circulating immune cell  
59 types<sup>6</sup>. Mux-seq is highly adaptable, requires minimal experimental modification over standard  
60 single-cell sequencing workflows, and has been shown to be compatible with single-cell RNA-  
61 seq, single-nuclei RNA-seq<sup>9</sup>, and CITE-seq<sup>10</sup>. However, current mux-seq implementations require

62 either reference genotypes or experimental barcoding to unambiguously assign cells to each  
63 sample. This limitation precludes the application of mux-seq for studies involving cells that are  
64 sensitive to manipulation or for samples where genotyping may not be feasible due to privacy or  
65 availability concerns.

66 Here, we introduce *clue*, a framework for mux-seq experiments that eliminates the need  
67 for reference genotypes or experimental barcoding. *Clue* incorporates a series of pooling  
68 schemes for efficient experiment encoding and a demultiplexing algorithm to determine the unique  
69 sample identity of each cell. This is made possible by the development of *freemuxlet*, an extension  
70 of demuxlet<sup>11</sup> that allows clustering of genetically-identical cells from pooled scRNA- and scATAC-  
71 seq experiments without reference genotypes. We applied *clue* to investigate the response of  
72 peripheral blood mononuclear cells (PBMCs) to five different agonists targeting the type I and  
73 type II interferon responses (recombinant IFN $\beta$  and IFN $\gamma$ ), viral sensing (R848), inflammatory  
74 response (TNF $\alpha$ ), and broad immune cell activation (PMA/I). The *clue* framework allowed us to  
75 perform multiplexed CITE-seq across 384 samples from 64 individuals across 12 pools in just one  
76 day. Analyzing 134,831 cells, we discovered rare cell types and identified cell type-specific  
77 transcriptional responses that were validated by bulk RNA-sequencing. We identified shared and  
78 specific transcriptional responses to interferons in monocytes, highlighted by the discovery of  
79 specific effects in non-classical monocytes related to a migratory phenotype induced by type I  
80 interferon and complement activation induced by type II interferon. Lastly, by integrating imputed  
81 genotyping data, we mapped cell type-specific cis response eQTLs (cis-reQTLs) to each  
82 stimulation, identifying specific associations in R848-stimulated naive B cells (*IFITM2*) and IFN $\beta$ -  
83 stimulated classical monocytes (*UBE2F*). These findings showcase the efficiency and robustness  
84 of *clue* as a framework for reference-free multiplexed single-cell sequencing.

## 85 Results

### 86 *clue: genetic multiplexing without reference genotypes*

87 Here, we introduce *clue* (compressed, lossless, unambiguous multiplexing), a workflow  
88 for multiplexed single-cell sequencing (mux-seq) that enables population-scale single-cell studies  
89 without reference genotypes or experimental barcoding (**Fig. 1A**). We illustrate the key features  
90 of *clue* utilizing a toy study that profiles  $n$  individuals over  $r$  conditions, where  $r < n$ . The  
91 conditions could be different perturbations (as illustrated), time points, or aliquots of the same  
92 cells. The core of *clue* is a  $p \times n$  pooling matrix that assigns each of  $n$  samples to one of  $p$  pools.  
93 After single-cell profiling of the pools, the resulting data is first analyzed through *freemuxlet*, a  
94 novel algorithm that clusters cells based on genetic variants identified directly from the single-cell  
95 sequencing data. Genetic clusters of cells from different pools are then demultiplexed, where  
96 each cell is correctly assigned to an individual and condition.

97 In order to ensure successful demultiplexing, *clue* aims to produce a pooling matrix that  
98 assigns the  $n \times r$  samples to a minimum number of pools while meeting three key objectives:

- 99
- 100 • Identifiability: each cell can be uniquely assigned to a sample (e.g., individual and  
101 condition);
  - 102 • Robustness: samples are distinguishable while tolerating errors in the pooling or genetic  
103 clustering;
  - 104 • Balance: cells from each individual and each condition are uniformly distributed across  
105 pools.

106

107 There are several different multiplexing schemes that can achieve these objectives. The naive  
108 all-minus-one (AMO) scheme which omits each individual's cells from exactly one pool meets the

109 identifiability objective but requires  $n$  pools, which limits the experimental efficiency of sample  
110 multiplexing (**Fig. 1B**). The *clue\_logarithmic* scheme assigns samples using at least  $p =$   
111  $2 \times \log_2(n)$  pools motivated by previous work describing logarithmic encoding<sup>12</sup>, which achieves  
112 significant compression compared to AMO and is experimentally easy to perform (**Fig. 1C**). In a  
113 toy example, multiplexing  $n = 20$  individuals over  $r = 3$  conditions can be encoded using  $p = 10$   
114 pools. However, it may not be the most compressed or error-tolerant scheme.

115 The *clue\_ILP* scheme uses integer linear programming (ILP) to identify the optimal  
116 multiplexing scheme (Methods). This scheme can further be optimized for condition  
117 randomization and error tolerance, by distributing the samples and maximizing the differences in  
118 the multiplexing matrix profiles, respectively (**Fig. 1E, Fig. S1**). In our toy example, the most  
119 compressed scheme only needed  $p = 6$  pools to ensure demultiplexing (**Fig. 1D**), and an error-  
120 tolerant multiplexing scheme required  $p = 12$  (**Fig. 1E**).

## 121 *freemuxlet: genetic clustering of single cells without reference genotypes*

122 The *clue* framework requires the ability to group genetically identical cells without relying  
123 on reference genotypes obtained from a genotyping array or sequencing. To meet this need, we  
124 developed *freemuxlet*, an approach based on demuxlet<sup>11</sup> that genetically clusters cells using only  
125 SNPs captured from multiplexed single-cell sequencing data (**Fig. 2A**). Instead of relying on  
126 reference genotypes, *freemuxlet* uses unsupervised learning to efficiently cluster genetically-  
127 identical cells and identify heterotypic multiplets — droplets containing two or more cells from  
128 different individuals.

129 At its core, *freemuxlet* uses a modified Expectation-Maximization (E-M) algorithm to  
130 assign barcoded droplets containing cells to clusters, updating the cluster assignments iteratively.  
131 A droplet is labeled as a singlet if it has been successfully assigned to a single cluster, or a  
132 multiplet if it cannot be unequivocally assigned to any given cluster. Compared to existing genetic

133 clustering algorithms like scSplit<sup>13</sup>, vireo<sup>14</sup>, and souporecell<sup>15</sup>, freemuxlet stands out with two key  
134 features. Firstly, freemuxlet incorporates a singlet score based solely on allele frequencies,  
135 significantly improving the quality of initial clustering and the speed and accuracy of convergence.  
136 This becomes especially crucial when dealing with a large number of multiplexed individuals or  
137 high multiplet rates. Secondly, freemuxlet refines cluster assignments using an identity-aware  
138 Bayes factor that leverages both base and read quality to extract the maximum information from  
139 the sequence data. Indeed, these two aspects may explain the superior performance of  
140 *freemuxlet* compared to existing methods<sup>16</sup>.

141 To showcase the performance of *freemuxlet* and its suitability for the *clue* framework, we  
142 conducted multiplexed single-cell RNA- and ATAC-seq experiments assaying PBMCs from 5  
143 individuals across 4 conditions using the AMO multiplexing scheme. By using a set of curated  
144 SNP locations (Methods), *freemuxlet* was able to group cells based on their genotypes estimated  
145 from either the single-cell RNA-seq or the ATAC-seq data. The results from the ATAC-seq data,  
146 visualized using Uniformed Manifold Approximation and Projection (UMAP) of the pairwise  
147 genetic distances, showed 5 distinct clusters of singlets and putative doublets occupying regions  
148 of the UMAP between clusters (**Fig. 2B, Fig. S2A**). Analysis of the RNA-seq data revealed allele-  
149 specific expression only in certain cell types or in response to certain perturbations, which  
150 highlights the importance of incorporating allele frequency in the clustering algorithm (**Fig. S2B**).  
151 The demultiplexing results from both the RNA-seq and ATAC-seq data matched the pooling  
152 matrix (**Fig. 2C**) and were consistent with demultiplexing using demuxlet with reference genotypes  
153 (**Fig. S2C**). Furthermore, the genotypes detected from both RNA-seq and ATAC-seq were in  
154 agreement with those obtained from a SNP genotyping array (**Fig. S2D**). By visualizing the  
155 resulting demultiplexed single-cell RNA- and ATAC-seq profiles using UMAP, we observed cells  
156 clustered primarily by type, and to a lesser extent by stimulation. Differential expression analysis  
157 of the same cell type between different conditions provides further evidence of correct  
158 demultiplexing (**Fig. 2D, Fig. S3**). For example, PMA/I stimulation induced the strongest effects,

159 with stimulated cells of each major cell type forming distinct clusters from unstimulated cells of  
160 the same type. On the other hand, IFN $\gamma$  stimulation had the weakest effects, with stimulated cells  
161 mostly clustering with unstimulated cells. These results show that *freemuxlet* is a reference-free  
162 method for clustering cells based on genetic variation, suitable for both single-cell RNA-seq and  
163 ATAC-seq data and can be deployed in the *clue* framework to enable population-scale single-cell  
164 sequencing studies.

### 165 *Application of clue to parse cell type-specific immune responses*

166 To demonstrate the suitability and scalability of the *clue* framework for population-scale  
167 single-cell sequencing studies, we performed a multiplexed single-cell CITE-seq experiment to  
168 study the genetic modulation of immune response in PBMCs. We assayed PBMCs from 64  
169 female, non-hispanic white healthy individuals either at rest (unstimulated control) or stimulated  
170 with one of five immunomodulatory molecules: tumor necrosis factor alpha (TNF $\alpha$ ), interferons  
171 gamma (IFN $\gamma$ ) and beta (IFN $\beta$ ), TLR7/8 agonist resiquimod-848 (R848), and phorbol-myristate-  
172 acetate with ionomycin (PMA/I) (**Fig. 3A**). The cells were profiled at 9 hours post-stimulation, a  
173 time point that was found to induce potent transcriptional effects in response to most stimuli from  
174 bulk RNA-sequencing of PBMCs (**Fig. S4A–B**). The full experiment of 384 samples (64  
175 individuals by 6 conditions) was profiled in 12 pools according to a pooling matrix produced by  
176 *clue\_logarithmic*. The matrix assigned 32 genetically-distinct samples per pool, utilizing an  
177 internally-symmetric tree structure that is experimentally simple to execute (**Fig. 3B**). Upon  
178 sequencing, alignment, genetic clustering of cells using *freemuxlet*, and demultiplexing, we  
179 correctly reconstructed 98.9% elements of the pooling matrix (760/768 matrix elements; **Fig. 3C**,  
180 **Fig. S5A–B**). The errors were due to a mis-pooling event (genotype cluster 11) and the loss of  
181 one individual's cells during culture due to low viability (genotype cluster 59; **Fig. S5C**). Although



182 not explicitly optimized to be error-tolerant, the multiplexing scheme was robust to these errors  
183 and cells were assigned to 64 individuals across 6 conditions.

184 The demultiplexed CITE-seq data was visualized with UMAP, and the cell clusters  
185 determined by Leiden clustering generally tracked with cell type and stimulation and not with batch  
186 or other technical parameters (**Fig. 3D–E; Fig. S6A–C**). T and NK cells stimulated by IFN $\gamma$  and  
187 TNF $\alpha$  clustered together with control cells and separately from those stimulated by IFN $\beta$  and  
188 R848. For B cells, R848- and IFN $\beta$ -stimulated cells clustered together, whereas IFN $\gamma$ -stimulated  
189 and control cells clustered together. In monocytes, cells stimulated by each stimulus formed their  
190 own distinct cluster. PMA/I-stimulated lymphoid cells clustered out separately from other stimuli,  
191 replicating the strong effects observed in the AMO and bulk experiments, while PMA/I-stimulated  
192 myeloid cells were significantly depleted, likely due to differentiation and adhesion to the tissue  
193 culture plate after stimulation (Methods).

194 After performing differential expression (DE) analysis between stimulated and  
195 unstimulated cells, we identified 1853 DE genes in at least one cell type and one perturbation  
196 ( $\log_2(\text{Fold Change}) > 1$ ,  $p_{adj} < 0.05$ ). We then used K-means clustering to group these genes  
197 into functional modules that were enriched for immune-related pathways such as cytokine  
198 signaling, activation, response to exogenous stimulation (e.g. LPS, virus, other organism), type I  
199 IFN signaling, adaptive immune response, and apoptosis (**Fig. 3F, Fig. S6D–G, Table S1**). TNF $\alpha$   
200 induced the lowest fold change, except for genes related to cellular ion homeostasis (e.g., *MT1*),  
201 while PMA/I induced the highest fold change, especially for genes related to ribosome biogenesis,  
202 RNA processing, and proliferation. IFN $\gamma$ , IFN $\beta$ , and R848 induced intermediate fold changes for  
203 genes implicated in TLR signaling, defense response, and antigen processing/presentation.  
204 Importantly, the log fold change estimates from the pseudobulk analysis of the scRNA-seq data  
205 were highly consistent with those estimated from the bulk PBMC RNA-sequencing data after 9  
206 hours of stimulation (**Fig. 3F, Fig. S4C**). These findings demonstrate the *clue* framework can be

207 deployed at scale to map cell type-specific responses to immune modulation in circulating immune  
208 cells.

209 *Identification of rare lymphoid cell types and stimulation-specific*  
210 *transcriptional responses*

211 To assess the impact of stimulation on PBMC subsets, we next analyzed the data after  
212 subclustering cells based on their lineage (Methods). We first jointly analyzed T and NK cells,  
213 identifying 22 distinct cell clusters consisting of naive and memory T cell subsets, gamma delta T  
214 cells ( $T_{\gamma\delta}$ ), mucosal associated invariant T (MAIT) cells, and NK cells (**Fig. 4A–B**). Within naive  
215  $CD4^+$  and  $CD8^+$  T cells (confirmed by  $CD45RA^+$  surface expression), we identified 4 subclusters  
216 that were differentiated by the expression of *SELL* ( $CD62L$ ) and *CD69* ( $CD69$ ) transcript and  
217 protein, indicating a spectrum of stimulation-specific phenotypes. Cluster 7 consisted of R848-  
218 stimulated  $CD4^+$  and  $CD8^+$  cells, which suggested condition-specific effects shared between the  
219 T cell subsets. Activated ( $CD45RO^+$ , cluster 5) and resting ( $CD45RA^+$ , cluster 6) Tregs were  
220 marked by their specific expression of *FOXP3*. Among other  $CD45RO^+$   $CD4^+$  T cells, we identified  
221  $T_H2$  cells (*CDO1*, *PTGDR2*; cluster 10) and a cluster of cells that did not polarize to any particular  
222 T helper cell state (*CXCR3*, *CXCR5*, *RORC*, *CCR4*, *CCR5*, *CCR6*; cluster 9; **Fig. S7A**). Notably,  
223 we found a subset of  $CD8^+$  T cells with high transcript and protein expression of *ITGAE* ( $CD103$ )  
224 (cluster 11), which is a marker for tissue resident memory cells ( $T_{RM}$ ). Among the cytotoxic cells  
225 marked by the expression of granzyme family members ( $GZM^+$ ), we identified expected subsets  
226 of memory  $CD8^+$  T cells,  $T_{\gamma\delta}$  cells, MAIT cells, and NK cells. We also found a cluster of  $CD56$ -  
227 expressing cells with high expression of *IL2RA* ( $CD25$ ) and c-kit ( $CD117$ ), and lower expression  
228 of granzymes and transcription factors (TFs) *EOMES* and *TBX21* (Tbet), supporting their  
229 annotation as circulating innate lymphoid cells (ILCs)<sup>17,18</sup> (**Fig. S7B**). Lastly, we identified two  
230 small populations (clusters 13 and 14) marked by the expression of TFs *ZNF683* (HOBIT) and

231 *IKZF2* (HELIOS) and differentiated by the expression of *MME* (CD10) (**Fig. S7C–D**). Cluster 13  
232 is labeled as immature T cells or common lymphoid progenitors (CLPs)<sup>19,20</sup>, an annotation further  
233 supported by their expression of other genes shown to be involved in T cell development (e.g.  
234 *SOX4*<sup>21</sup>, *FXDY2*<sup>22</sup>; shared with *SELL*<sup>+</sup> and *SELL*<sup>int</sup> naive subsets, respectively; **Fig. S7E**). Cluster  
235 14 resembles the recently-described HOBIT<sup>+</sup>/HELIOS<sup>+</sup> T cells<sup>23</sup>, an unexpected finding in  
236 circulation since HOBIT has been shown to identify non-circulating resident memory T cell  
237 precursors<sup>24</sup>.

238 To systematically identify cell type-specific transcriptional responses to perturbation, we  
239 ordered the DE genes by the ratio of their log<sub>2</sub>(FC) from control to their mean expression in all  
240 other cell types of the same condition (**Fig. S8A, Table S2, Methods**). For example, we identified  
241 several genes that were upregulated in IFNβ- and R848-stimulated NK cells (cluster 20) but lowly  
242 expressed in almost all other cell types (**Fig. 4C–E, Fig. S8B**). Two of the most notable genes  
243 that emerged were *RNF165* and *FRMD3*, both of which have been recently associated with worse  
244 prognosis in colorectal cancer<sup>25,26</sup> and possibly marking tumor-infiltrating NK cells.

245 In addition to T and NK cells, we identified 5 subtypes within the B and plasma cells,  
246 including naive and memory B cells, plasmablasts (PB), polyclonal plasmablastic cells (PPC), and  
247 mature plasma cells (PC), which were observed across all conditions (**Fig. 4F, Fig. S8C**). PPCs,  
248 marked by *PCNA*, *TYMS*, and *MKI67*, comprised less than 0.02% of all cells (**Fig. S8D**) and have  
249 not been described in other PBMC datasets to the best of our knowledge. This likely reflects their  
250 *in vitro* differentiation from circulating B cells in culture, consistent with previous reports of their  
251 generation from cytokine stimulation<sup>27</sup>. We found that PMA/I, and to a lesser extent R848, induced  
252 the expression of canonical PB genes in memory B cells (*CD226*, *MET*, *TVP23A*, *MGLL*; **Fig.**  
253 **S8E–F**), suggesting that these specific perturbations may be inducing early differentiation of  
254 memory B cells into PBs. Furthermore, we identified genes specifically upregulated in IFNβ-  
255 stimulated memory B cells, including the striking upregulation of *ERICH3* encoding glutamate rich  
256 protein 3, a poorly-understood vesicle- and cilium-associated gene mainly expressed in the

257 central nervous system<sup>28,29</sup> (**Fig. 4G–H**). In addition to memory B cells, *ERICH3* was also  
258 upregulated in NK cells, CD8<sup>+</sup> T memory subsets, and pDCs specifically in response to IFN $\beta$ .  
259 Outside neuronal cells, *ERICH3* has been shown to be upregulated in B cell aggregates in the  
260 meninges of the experimental autoimmune encephalomyelitis (EAE) mouse model of multiple  
261 sclerosis<sup>30</sup>, a disease commonly controlled with IFN $\beta$  treatment that requires B cells for efficacy<sup>31</sup>.

## 262 *Type I and II interferons elicit shared and specific transcriptional responses* 263 *in monocytes*

264 We next performed a focused analysis to characterize the specific and shared  
265 transcriptional responses of classical (cM) and non-classical (ncM) monocytes to type I (IFN $\beta$ )  
266 and type II (IFN $\gamma$ ) interferons. In response to either IFN, hundreds of genes were upregulated to  
267 similar levels in both cMs (452) and ncMs (205), including *CXCL10* and *GBP4* ( $\log_2(\text{FC}) > 0.5$ ,  
268  $p_{\text{adj}} < 0.05$ ; **Fig. 5A**). We also observed genes that were more highly induced in response to IFN $\gamma$   
269 (cM: 587, ncM: 140) including *CXCL9*, IFN $\beta$  (cM: 903, ncM: 315) including *CCL8*, or exhibited  
270 opposing effects in response to the two IFNs, such as *LRRK2* and *CCL7*.

271 To annotate the upregulated genes, we performed gene ontology (GO) biological pathway  
272 enrichment analysis using BiNGO<sup>32</sup>, which generates a network graph of enriched GO terms as  
273 nodes and shared genes between terms as edges (**Fig. 5B**). We grouped similar terms into  
274 “pathway clusters” using Leiden clustering and identified similar pathway clusters shared between  
275 the IFNs based on high Jaccard Index of ontology terms (**Fig. 5C**; Methods). In cMs, we identified  
276 30 clusters, with 10 clusters (clusters 0–9) highly similar between the IFNs and 11 (IFN $\beta$ ) and 9  
277 (IFN $\gamma$ ) clusters specific to each IFN. Clusters specific to IFN $\beta$ -stimulated cells were enriched for  
278 defense response (13), chloride ion homeostasis (14), and RNA catabolic processes (1) while  
279 clusters specific to IFN $\gamma$ -stimulated cells were enriched for antigen presentation (24), lymphocyte-  
280 mediated immunity (21), and protein catabolic processes (26). In ncMs, we observed 27 clusters,

281 with 6 highly similar clusters shared between the IFNs (clusters 0–5) enriched for many of the  
282 same terms as in cMs (Jaccard Index: IFN $\beta$ , 0.397; IFN $\gamma$ , 0.501), and 11 (IFN $\beta$ ) and 10 (IFN $\gamma$ )  
283 clusters specific to each interferon. Directly comparing the significance of terms enriched for each  
284 IFN, we note that even in highly similar pathway clusters, terms may be much more significant for  
285 one IFN than the other, including those related to lymphocyte activation in IFN $\gamma$  and NF- $\kappa$ B  
286 signaling in IFN $\beta$  (**Fig. 5D**).

287 We further analyzed DE genes that may contribute to the enrichment of specific pathway  
288 terms for each IFN (**Fig. 5E**). While many genes involved in inflammatory response were similarly  
289 upregulated in cMs stimulated with either IFN, some genes exhibited specificity either in response  
290 to IFN $\beta$ , including *CCL8*, *IL27*, *CCL7*, *IL1RN*, and *SIGLEC1*, or IFN $\gamma$ , including *APOL3*, *P2RX7*,  
291 *CD40*, *CXCL9*, and *IDO1*. In ncMs compared to cMs, many of the same genes and annotated  
292 pathways exhibited similar specific and shared responses to IFN $\beta$  and IFN $\gamma$ . We next  
293 systematically searched for genes that exhibit an ncM-specific response to either interferon.  
294 Among the top ncM-specific genes induced by IFN $\beta$  were *CXCL12*, *CH25H*, *FMNL2*, *LILRA5*, and  
295 *KCNMA1*, all of which have been implicated in the polarization of ncMs to a migratory  
296 phenotype<sup>33–36</sup> (**Fig. 5F**). In particular, *CH25H*, a known ISG with established antiviral function<sup>37</sup>,  
297 has been implicated in adipose-tissue inflammation in obesity and diabetes<sup>38</sup>. Among the top ncM-  
298 specific genes induced by IFN $\gamma$  were *CTLA4*, *C1Q* complement genes, *C2*, *P2Y* receptors  
299 *P2RY13*, *P2RY14*, and the P2Y receptor-like *SUCNR1*. The P2Y paralogs have been previously  
300 described as ISGs in various disease and stimulation contexts<sup>39,40</sup>. We note that the expression  
301 of *C1Q* and *C2* further distinguished two subpopulations of ncMs in response to IFN $\gamma$  (**Fig. 5G**).  
302 *C1Q*-expressing ncMs have been reported in autoimmune diseases including systemic lupus  
303 erythematosus (SLE)<sup>6</sup>, while early growth response gene *EGR3* is known to be upregulated  
304 during differentiation of ncMs into macrophages and has also been implicated in autoimmune  
305 diseases with complement system dysfunction such as SLE<sup>41,42</sup>. However, the induction of these  
306 populations specifically by IFN $\gamma$  has not been previously reported to the best of our knowledge.

307 *clue enables the discovery of cell type-specific response expression*  
308 *quantitative trait loci*

309 With its ability to encode orthogonal experimental information into each condition, the *clue*  
310 framework is uniquely suited for single-cell eQTL studies aimed to identify interactions between  
311 genetic variants and experimental conditions such as perturbations. To demonstrate this, we  
312 performed an eQTL analysis across 16 different cell types and 6 conditions, which yielded  
313 158,445 significant *cis*-eQTLs (**Fig. 6A**). Naive CD4<sup>+</sup> T cells had the highest number of eQTLs  
314 (52,016) likely reflecting the large number of cells comprising this group and the low transcriptional  
315 heterogeneity across individuals (**Fig. S9A**). Across all cell types, HLA locus genes, ribosomal  
316 proteins (e.g. *RPS26*, *RPL8*), and the aminopeptidase *ERAP2* were among the most significant  
317 eQTLs. Both shared (*PLEC*, *DNAJC15*) and cell type-specific eQTLs (*CTSW*, *ARHGAP24*,  
318 *CD151*) were observed, some of which only emerged in response to stimulation (*GBP7*, *IFITM3*,  
319 and *SLFN5*; **Fig. S9B–D**).

320 We and others have previously shown that cell type-specific *cis*-eQTLs are enriched in  
321 cell type-specific *cis*-regulatory elements. To confirm this observation, we performed enrichment  
322 analysis using cell type-specific regions of chromatin accessibility estimated from the single-cell  
323 ATAC-seq data from the AMO experiment. In unstimulated cells, *cis*-eQTLs were enriched in  
324 ATAC peaks called across all cell types (**Fig. 6B**, Methods). Furthermore, *cis*-eQTLs detected in  
325 a given cell type are significantly enriched for peaks specific to the same cell type (Mann Whitney  
326 U: CD4<sup>+</sup> T<sub>NAIVE</sub>,  $p = 6.4 \times 10^{-23}$ ; NK,  $p = 4.1 \times 10^{-6}$ ; B cell,  $p = 9.7 \times 10^{-115}$ ; cM,  $p = 8.3 \times 10^{-77}$ ; **Fig.**  
327 **6C**).

328 We further explored how *cis*-eQTLs could modify the effects of stimulation by comparing  
329 the effect sizes and significance for shared and condition-specific eQTLs (**Fig. 6D**). For example,  
330 we identified R848-specific *cis*-eQTLs for *TMEM220*, *IFITM2*, and *P2RX5* in naive B cells and  
331 TNF $\alpha$ -specific *cis*-eQTLs for *MAP3K5* and *NINJ1* in cMs. Both *MAP3K5* and *NINJ1* are known to

332 be induced by TNF $\alpha$  and have been previously reported as eQTLs in lung<sup>43</sup> and heart<sup>44</sup>.  
333 Furthermore within cMs, we observed some of the most significant *cis*-eQTLs in response to the  
334 interferons including IFN $\beta$ -specific *cis*-eQTLs for *ITSN1*, which has been previously reported in  
335 whole blood and skin, and IFN $\gamma$ -specific *cis*-eQTLs for *UPF2*, a regulator of nonsense-mediated  
336 decay implicated in developmental disorders and with links to immune infiltration into the brain by  
337 macrophages and other immune cells<sup>45</sup>. Finally, we demonstrate that a subset of these  
338 associations are specific to both cell type and condition. For example, significant associations in  
339 *IFITM2* were found solely in R848-stimulated naïve B cells, while associations in *UBE2F* were  
340 restricted to IFN $\beta$ -stimulated cMs (**Fig. 6E–F**). These findings demonstrate the power of utilizing  
341 the *clue* framework for population-scale single-cell eQTL analyses, mapping genetic variants that  
342 interact with experimental perturbations to impact gene expression across multiple cell types.

## 343 Discussion

344 Multiplexed single-cell sequencing (mux-seq) is emerging as a systematic approach to  
345 characterize the molecular profiles of cell types in large population cohorts. The integration of  
346 experimental perturbations and donor genetics enables the analysis of interindividual variability  
347 in molecular response and its genetic determinants. However, existing mux-seq implementations  
348 require reference genotyping or experimental barcoding, which incurs additional cost and may be  
349 experimentally challenging to deploy. To overcome these challenges, we developed *clue*, a  
350 framework for designing mux-seq experiments where single cells can be deterministically  
351 demultiplexed utilizing only the genotypes detected from the data. Central to *clue* is the  
352 development of *freemuxlet*, an algorithm that clusters single cells based on their genetic profiles  
353 and identifies instances where multiple cells from distinct individuals receive the same partition  
354 (droplet or well) barcode. *clue* obviates the need for reference genotyping while yielding high

355 quality single-cell epigenomic, transcriptomic, and surface protein profiles from many individuals  
356 that can be used in studies of the genetic determinants of gene regulation.

357 To demonstrate the utility of the *clue* framework, we performed RNA and surface proteome  
358 sequencing in PBMCs from 64 individuals, introduced perturbations by taking advantage of  
359 redundant samples (creating 384 unique individual-conditions profiled in 12 pools), and performed  
360 differential expression and eQTL analyses with the resulting data. Genetic clustering using  
361 *freemuxlet*, followed by demultiplexing, assigned cells to individuals with high signal-to-noise and  
362 was robust to technical errors. The resulting demultiplexed data showed enrichment of  
363 differentially expressed genes and proteins in relevant biological pathways across 12 broad cell  
364 types and 6 conditions. Stimulation induced cell type and stimulation-specific expression of genes  
365 participating in inflammation, cytokine signaling, and adaptive and innate immune responses.

366 The analysis of our data identified rare cell types and states previously not described from  
367 scRNA-seq of PBMCs that likely developed in culture or in response to stimulation. For example,  
368 we observed several tissue-resident phenotypes in multiple CD8<sup>+</sup> T cell subsets, distinguished  
369 most notably by the expression of CD103 (*ITGAE*) and *ZNF683* (which encodes HOBIT). While  
370 circulating CD103<sup>+</sup> CD4<sup>+</sup> T cells have been described in healthy individuals and proposed to be  
371 the basal recirculation of a skin-resident population<sup>46</sup>, their CD8<sup>+</sup> counterparts have not been  
372 previously described or characterized.

373 We found profound cell type-specific responses to TLR and IFNAR stimulation across  
374 monocyte and lymphocyte subsets. In particular IFN $\beta$ , and to a lesser extent R848, induced high  
375 expression of *RNF165* and *ERICH3* in lymphocyte but not monocyte subtypes, genes that have  
376 been implicated in colorectal cancer and autoimmunity. IFN $\beta$  and IFN $\gamma$  induced condition-specific  
377 and cell type-specific responses in classical and non-classical monocytes. Specific to non-  
378 classical monocytes, we observed that IFN $\beta$  induced a gene program suggestive of a migratory  
379 phenotype while IFN $\gamma$  stimulation produced two subpopulations differentiated by the expression



380 of complement components and *EGR3*. The two populations may correspond to recently-  
381 described subsets of ncMs distinguished by 6-sulfo LacNAc (SLAN, a carbohydrate modification  
382 of PSGL-1 protein, encoded by *SELPLG*), CD9, and CD61 surface expression<sup>47</sup>. We see higher  
383 albeit not statistically significant mean expression of CD9 transcript and protein, CD61 protein,  
384 and *SELPLG* transcript in the C2-expressing cluster, consistent with their annotations. However,  
385 further functional studies of these cell types to determine what role, if any, these genes play in  
386 the response to these agonists.

387         Lastly, we demonstrate the *clue* framework can be deployed for the mapping of eQTLs,  
388 demonstrate eQTL enrichment in ATAC peaks separately generated using *clue*, and explore  
389 those eQTLs that emerge only in certain cell types and stimulation conditions. We propose novel  
390 cell type- and condition-specific eQTLs in myeloid cells and B cells. We demonstrated *clue* at  
391 scale using CITE-seq but anticipate that *clue* can also be deployed for ATAC-seq and multiomic  
392 profiling of chromatin state and gene expression. While we report eQTLs identified by the  
393 integrated analysis of genotyping data, we anticipate that full-length cDNA sequencing and single-  
394 cell ATAC-seq may capture sufficient numbers of SNPs to enable high quality imputation and  
395 genetic mapping studies from single-cell genomic data alone. Indeed, emerging studies have  
396 already demonstrated that genotypes detected solely from scRNA-seq reads may be sufficient  
397 for eQTL discovery<sup>48-50</sup>.

398         There are several practical considerations for deploying the *clue* framework at scale. First,  
399 the *clue* framework is not explicitly developed to identify samples utilizing genotyping data. In fact,  
400 any multiplexing scheme can benefit from *clue* if the same barcoded samples will be profiled  
401 across multiple conditions. Second, for large experiments, we advise that statistical power be  
402 assessed carefully before employing the framework. Given a total number of cells to be  
403 sequenced for an experiment, including tens or hundreds of individuals in a pooling matrix with  
404 high compression will result in fewer cells per individual, which may hinder the ability to carry out  
405 certain downstream analyses. One way to compensate for low cell numbers per sample would be

406 to minimize or omit cross-pool variation (e.g. no stimulation conditions). Another would be to  
407 assay the same pool in multiple single-cell reactions, though this increases overall costs. Finally,  
408 committing to assaying a large number of samples in one experiment involves some assumption  
409 of risk, especially if samples are precious. Robotics are recommended, if available, to minimize  
410 human error and experiment duration. With these considerations, *clue* is a valuable framework  
411 for highly-multiplexed single-cell sequencing studies, obviates the need for reference genotypes,  
412 can be used for both RNA and ATAC profiling, and is scalable to genetic studies involving tens or  
413 hundreds of individuals.

414 **Methods References:**

415 Phred-scale base quality score<sup>51</sup>

416 Detecting contamination of human DNA samples<sup>52</sup>

417 ImmVar studies<sup>53–55</sup>

## 418 References

- 419 1. Freedman, M. L. *et al.* Principles for the post-GWAS functional characterization of cancer  
420 risk loci. *Nat. Genet.* **43**, 513–518 (2011).
- 421 2. Blattler, A. *et al.* Global loss of DNA methylation uncovers intronic enhancers in genes  
422 showing expression changes. *Genome Biol.* **15**, 469 (2014).
- 423 3. Varshney, A. *et al.* Genetic regulatory signatures underlying islet gene expression and type  
424 2 diabetes. *Proc. Natl. Acad. Sci. U. S. A.* **114**, 2301–2306 (2017).
- 425 4. Hular, I. *et al.* Enrichment of inflammatory bowel disease and colorectal cancer risk variants  
426 in colon expression quantitative trait loci. *BMC Genomics* **16**, 138 (2015).
- 427 5. Finucane, H. K. *et al.* Heritability enrichment of specifically expressed genes identifies  
428 disease-relevant tissues and cell types. *Nat. Genet.* **50**, 621–629 (2018).
- 429 6. Perez, R. K. *et al.* Single-cell RNA-seq reveals cell type-specific molecular and genetic  
430 associations to lupus. *Science* **376**, eabf1970 (2022).
- 431 7. Nathan, A. *et al.* Multimodally profiling memory T cells from a tuberculosis cohort identifies  
432 cell state associations with demographics, environment and disease. *Nat. Immunol.* **22**,  
433 781–793 (2021).
- 434 8. Yazar, S. *et al.* Single-cell eQTL mapping identifies cell type-specific genetic control of  
435 autoimmune disease. *Science* **376**, eabf3041 (2022).
- 436 9. Fujita, M. *et al.* Cell-subtype specific effects of genetic variation in the aging and Alzheimer  
437 cortex. *bioRxiv* 2022.11.07.515446 (2022) doi:10.1101/2022.11.07.515446.
- 438 10. van der Wijst, M. G. P. *et al.* Single-cell RNA sequencing identifies celltype-specific cis-  
439 eQTLs and co-expression QTLs. *Nat. Genet.* **50**, 493–497 (2018).
- 440 11. Kang, H. M. *et al.* Multiplexed droplet single-cell RNA-sequencing using natural genetic  
441 variation. *Nat. Biotechnol.* **36**, 89–94 (2018).
- 442 12. Prabhu, S. & Pe'er, I. Overlapping pools for high-throughput targeted resequencing.

- 443 *Genome Res.* **19**, 1254–1261 (2009).
- 444 13. Xu, J. *et al.* Genotype-free demultiplexing of pooled single-cell RNA-seq. *Genome Biol.* **20**,  
445 290 (2019).
- 446 14. Huang, Y., McCarthy, D. J. & Stegle, O. Vireo: Bayesian demultiplexing of pooled single-  
447 cell RNA-seq data without genotype reference. *Genome Biol.* **20**, 273 (2019).
- 448 15. Heaton, H. *et al.* Souporecell: robust clustering of single-cell RNA-seq data by genotype  
449 without reference genotypes. *Nat. Methods* **17**, 615–620 (2020).
- 450 16. Weber, L. M. *et al.* Genetic demultiplexing of pooled single-cell RNA-sequencing samples  
451 in cancer facilitates effective experimental design. *Gigascience* **10**, (2021).
- 452 17. Vivier, E. *et al.* Innate Lymphoid Cells: 10 Years On. *Cell* **174**, 1054–1066 (2018).
- 453 18. Carvelli, J. *et al.* Imbalance of Circulating Innate Lymphoid Cell Subpopulations in Patients  
454 With Septic Shock. *Front. Immunol.* **10**, 2179 (2019).
- 455 19. Cook, J. R., Craig, F. E. & Swerdlow, S. H. Benign CD10-positive T cells in reactive  
456 lymphoid proliferations and B-cell lymphomas. *Mod. Pathol.* **16**, 879–885 (2003).
- 457 20. Hystad, M. E. *et al.* Characterization of early stages of human B cell development by gene  
458 expression profiling. *The Journal of Immunology* **182**, 5882–5882 (2009).
- 459 21. Schilham, M. W., Moerer, P., Cumano, A. & Clevers, H. C. Sox-4 facilitates thymocyte  
460 differentiation. *Eur. J. Immunol.* **27**, 1292–1295 (1997).
- 461 22. Lee, M. S., Hanspers, K., Barker, C. S., Korn, A. P. & McCune, J. M. Gene expression  
462 profiles during human CD4+ T cell differentiation. *Int. Immunol.* **16**, 1109–1124 (2004).
- 463 23. Schattgen, S. A. *et al.* Integrating T cell receptor sequences and transcriptional profiles by  
464 clonotype neighbor graph analysis (CoNGA). *Nat. Biotechnol.* **40**, 54–63 (2022).
- 465 24. Parga-Vidal, L. *et al.* Hobit identifies tissue-resident memory T cell precursors that are  
466 regulated by Eomes. *Sci Immunol* **6**, (2021).
- 467 25. Shembrey, C. *et al.* A new highly-specific Natural Killer cell-specific gene signature  
468 predicting recurrence in colorectal cancer patients. *bioRxiv* 2022.04.29.489868 (2022)

- 469 doi:10.1101/2022.04.29.489868.
- 470 26. Chen, T.-J. *et al.* High FRMD3 expression is prognostic for worse survival in rectal cancer  
471 patients treated with CCRT. *Int. J. Clin. Oncol.* **26**, 1689–1697 (2021).
- 472 27. Tarte, K., Zhan, F., De Vos, J., Klein, B. & Shaughnessy, J., Jr. Gene expression profiling  
473 of plasma cells and plasmablasts: toward a better understanding of the late stages of B-cell  
474 differentiation. *Blood* **102**, 592–600 (2003).
- 475 28. Alsolami, M., Kuhns, S., Alsulami, M. & Blacque, O. E. ERICH3 in Primary Cilia Regulates  
476 Cilium Formation and the Localisations of Ciliary Transport and Sonic Hedgehog Signaling  
477 Proteins. *Sci. Rep.* **9**, 16519 (2019).
- 478 29. Liu, D. *et al.* ERICH3: vesicular association and antidepressant treatment response. *Mol.*  
479 *Psychiatry* **26**, 2415–2428 (2021).
- 480 30. Schropp, V. *et al.* Contribution of LT $\alpha$  and TH17 cells to B cell aggregate formation in the  
481 central nervous system in a mouse model of multiple sclerosis. *J. Neuroinflammation* **16**,  
482 111 (2019).
- 483 31. Schubert, R. D. *et al.* IFN- $\beta$  treatment requires B cells for efficacy in neuroautoimmunity. *J.*  
484 *Immunol.* **194**, 2110–2116 (2015).
- 485 32. Maere, S., Heymans, K. & Kuiper, M. BiNGO: a Cytoscape plugin to assess  
486 overrepresentation of gene ontology categories in biological networks. *Bioinformatics* **21**,  
487 3448–3449 (2005).
- 488 33. Sanyal, R. *et al.* MS4A4A: a novel cell surface marker for M2 macrophages and plasma  
489 cells. *Immunol. Cell Biol.* **95**, 611–619 (2017).
- 490 34. Sánchez-Martín, L. *et al.* The chemokine CXCL12 regulates monocyte-macrophage  
491 differentiation and RUNX3 expression. *Blood* **117**, 88–97 (2011).
- 492 35. Cheng, S.-M. *et al.* Differential expression of distinct surface markers in early endothelial  
493 progenitor cells and monocyte-derived macrophages. *Gene Expr.* **16**, 15–24 (2013).
- 494 36. Lee, P. Y. *et al.* Type I interferon modulates monocyte recruitment and maturation in

- 495 chronic inflammation. *Am. J. Pathol.* **175**, 2023–2033 (2009).
- 496 37. Song, H. *et al.* Hepatitis B Virus-Induced Imbalance of Inflammatory and Antiviral Signaling  
497 by Differential Phosphorylation of STAT1 in Human Monocytes. *J. Immunol.* **202**, 2266–  
498 2275 (2019).
- 499 38. Russo, L. *et al.* Cholesterol 25-hydroxylase (CH25H) as a promoter of adipose tissue  
500 inflammation in obesity and diabetes. *Mol Metab* **39**, 100983 (2020).
- 501 39. Zhang, C. *et al.* IFN-stimulated P2Y13 protects mice from viral infection by suppressing the  
502 cAMP/EPAC1 signaling pathway. *J. Mol. Cell Biol.* **11**, 395–407 (2019).
- 503 40. Bhakta, N. R. *et al.* IFN-stimulated Gene Expression, Type 2 Inflammation, and  
504 Endoplasmic Reticulum Stress in Asthma. *Am. J. Respir. Crit. Care Med.* **197**, 313–324  
505 (2018).
- 506 41. Morita, K. *et al.* Emerging roles of Egr2 and Egr3 in the control of systemic autoimmunity.  
507 *Rheumatology* **55**, ii76–ii81 (2016).
- 508 42. Carter, J. H. & Tourtellotte, W. G. Early growth response transcriptional regulators are  
509 dispensable for macrophage differentiation. *J. Immunol.* **178**, 3038–3047 (2007).
- 510 43. Hildebrandt, M. A. T. *et al.* Genetic variation in the TNF/TRAF2/ASK1/p38 kinase signaling  
511 pathway as markers for postoperative pulmonary complications in lung cancer patients. *Sci.*  
512 *Rep.* **5**, 12068 (2015).
- 513 44. Toma, L. *et al.* Ninjurin-1 upregulated by TNF $\alpha$  receptor 1 stimulates monocyte adhesion to  
514 human TNF $\alpha$ -activated endothelial cells; benefic effects of amlodipine. *Life Sci.* **249**,  
515 117518 (2020).
- 516 45. Johnson, J. L. *et al.* Inhibition of Upf2-Dependent Nonsense-Mediated Decay Leads to  
517 Behavioral and Neurophysiological Abnormalities by Activating the Immune Response.  
518 *Neuron* **104**, 665–679.e8 (2019).
- 519 46. Klicznik, M. M. *et al.* Human CD4<sup>+</sup>CD103<sup>+</sup> cutaneous resident memory T cells are found in  
520 the circulation of healthy individuals. *Sci Immunol* **4**, (2019).

- 521 47. Kapellos, T. S. *et al.* Human Monocyte Subsets and Phenotypes in Major Chronic  
522 Inflammatory Diseases. *Front. Immunol.* **10**, 2035 (2019).
- 523 48. Ma, T., Li, H. & Zhang, X. Discovering single-cell eQTLs from scRNA-seq data only. *Gene*  
524 **829**, 146520 (2022).
- 525 49. Deelen, P. *et al.* Calling genotypes from public RNA-sequencing data enables identification  
526 of genetic variants that affect gene-expression levels. *Genome Med.* **7**, 30 (2015).
- 527 50. Schadt, E. E., Woo, S. & Hao, K. Bayesian method to predict individual SNP genotypes  
528 from gene expression data. *Nat. Genet.* **44**, 603–608 (2012).
- 529 51. Ewing, B. & Green, P. Base-calling of automated sequencer traces using phred. II. Error  
530 probabilities. *Genome Res.* **8**, 186–194 (1998).
- 531 52. Jun, G. *et al.* Detecting and estimating contamination of human DNA samples in  
532 sequencing and array-based genotype data. *Am. J. Hum. Genet.* **91**, 839–848 (2012).
- 533 53. Raj, T. *et al.* Polarization of the effects of autoimmune and neurodegenerative risk alleles in  
534 leukocytes. *Science* **344**, 519–523 (2014).
- 535 54. Lee, M. N. *et al.* Common genetic variants modulate pathogen-sensing responses in  
536 human dendritic cells. *Science* **343**, 1246980 (2014).
- 537 55. Ye, C. J. *et al.* Intersection of population variation and autoimmunity genetics in human T  
538 cell activation. *Science* **345**, 1254665 (2014).



Figure 1

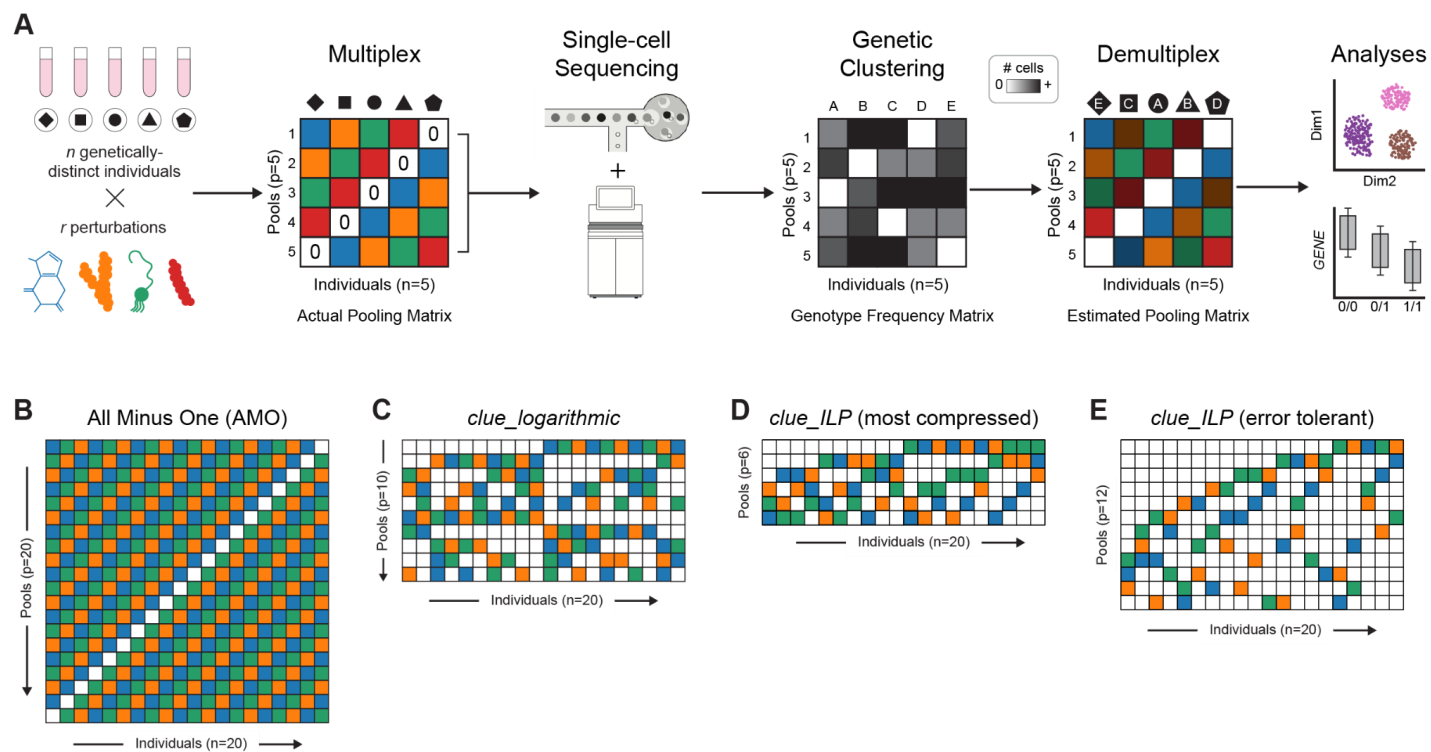

**Figure 1. Overview of the *clue* framework.** **A**, Illustrative schematic of the *clue* framework using the all-minus-one (AMO) pooling matrix, in which cells from one individual are omitted per pool. After single-cell sequencing, cells are genetically clustered and can be demultiplexed by identifying which samples are absent in each pool. Off-diagonal variance in cell numbers in the genotype frequency matrix is due to technical variability (e.g. unequal mixing of cells). The estimated pooling matrix is overlaid with the shading from the genotype frequency matrix to indicate the number of cells observed per individual-pool. **B**, For a toy example of 20 individuals and 3 perturbations, an AMO pooling matrix is identifiable but not most compact. **C**, *clue\_logarithmic* is a more compressed pooling matrix with fewer pools. *clue\_ILP* enables discovery of **D**, optimal (i.e. most compressed) pooling schemes and **E**, those that are error tolerant and batch effects minimized.

Figure 2

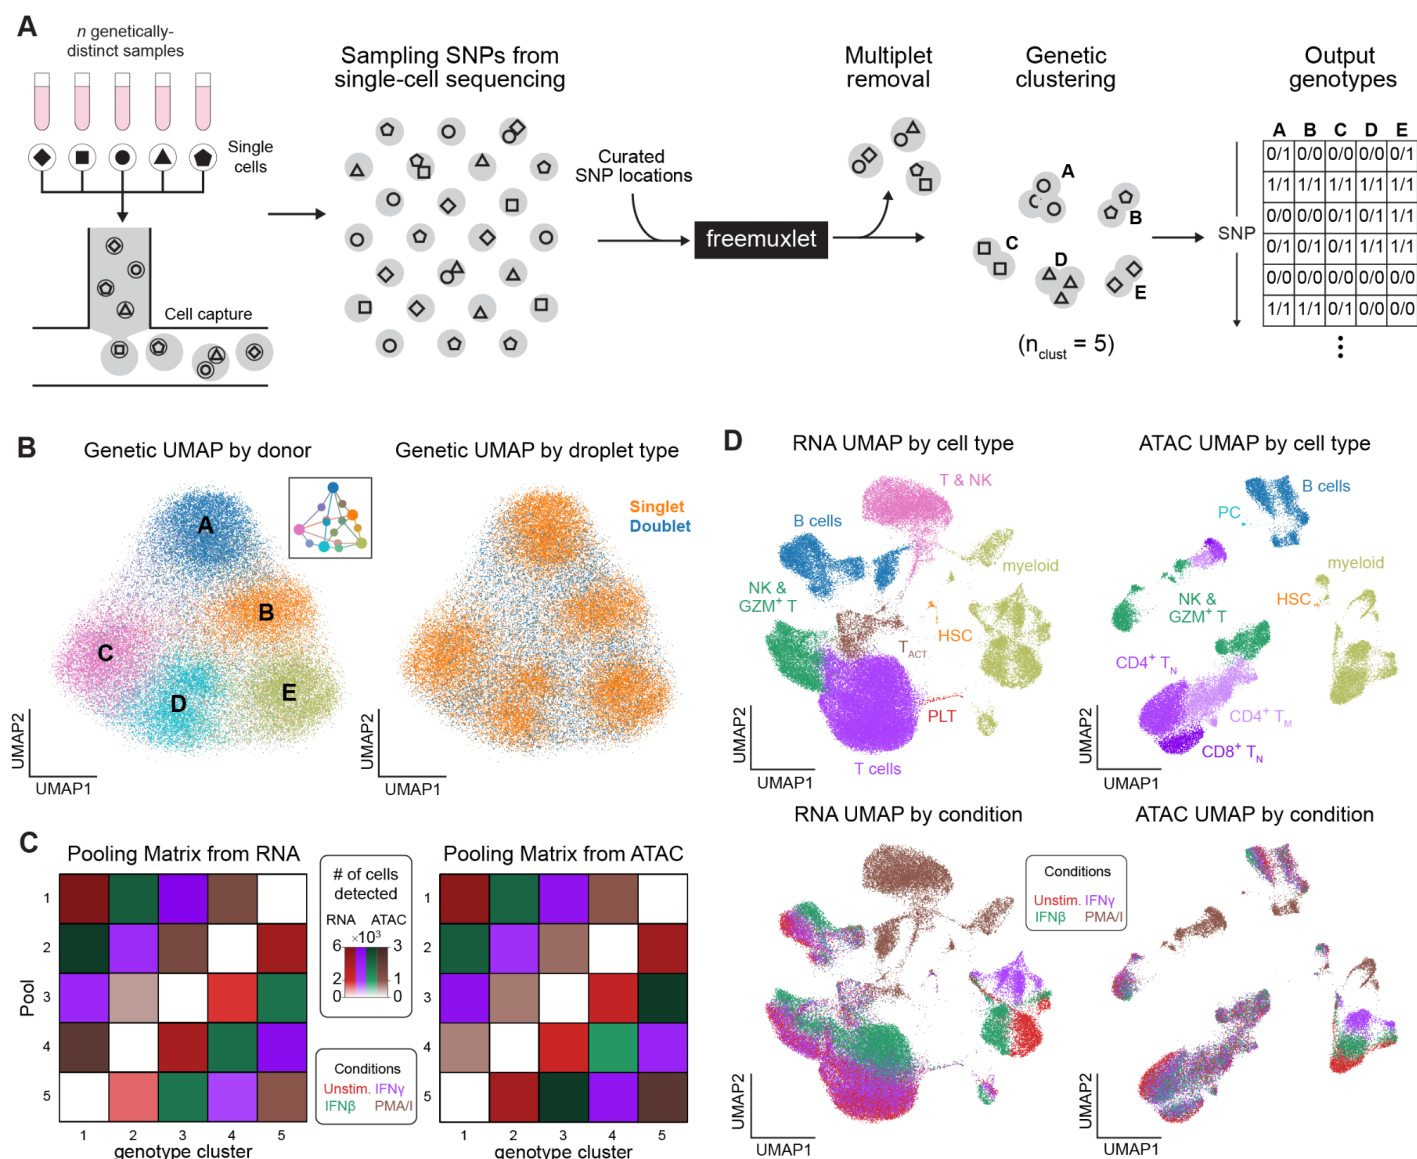

**Figure 2. Overview of freemuxlet as applied to *clue* data.** **A**, Schematic of the freemuxlet algorithm, in which single-cell sequencing data and a curated set of loci are input, and genetically-distinct clusters of singlets and a variant calling format (VCF) genotype file are output. **B**, Visualizing the pairwise genetic distance between droplets in UMAP space shows 5 distinct clusters corresponding to the 5 input individuals, as well as putative doublets that embed between constituent donor clusters. **C**, The estimated pooling matrix of singlets from the AMO experiment recapitulates the actual pooling matrix for both RNA and ATAC assays. Stimulation conditions are introduced to take advantage of redundancy. **D**, The resulting single-cell transcriptome and chromatin accessibility profiles visualized in UMAP space show heterogeneity due to both cell type and stimulation condition.

Figure 3

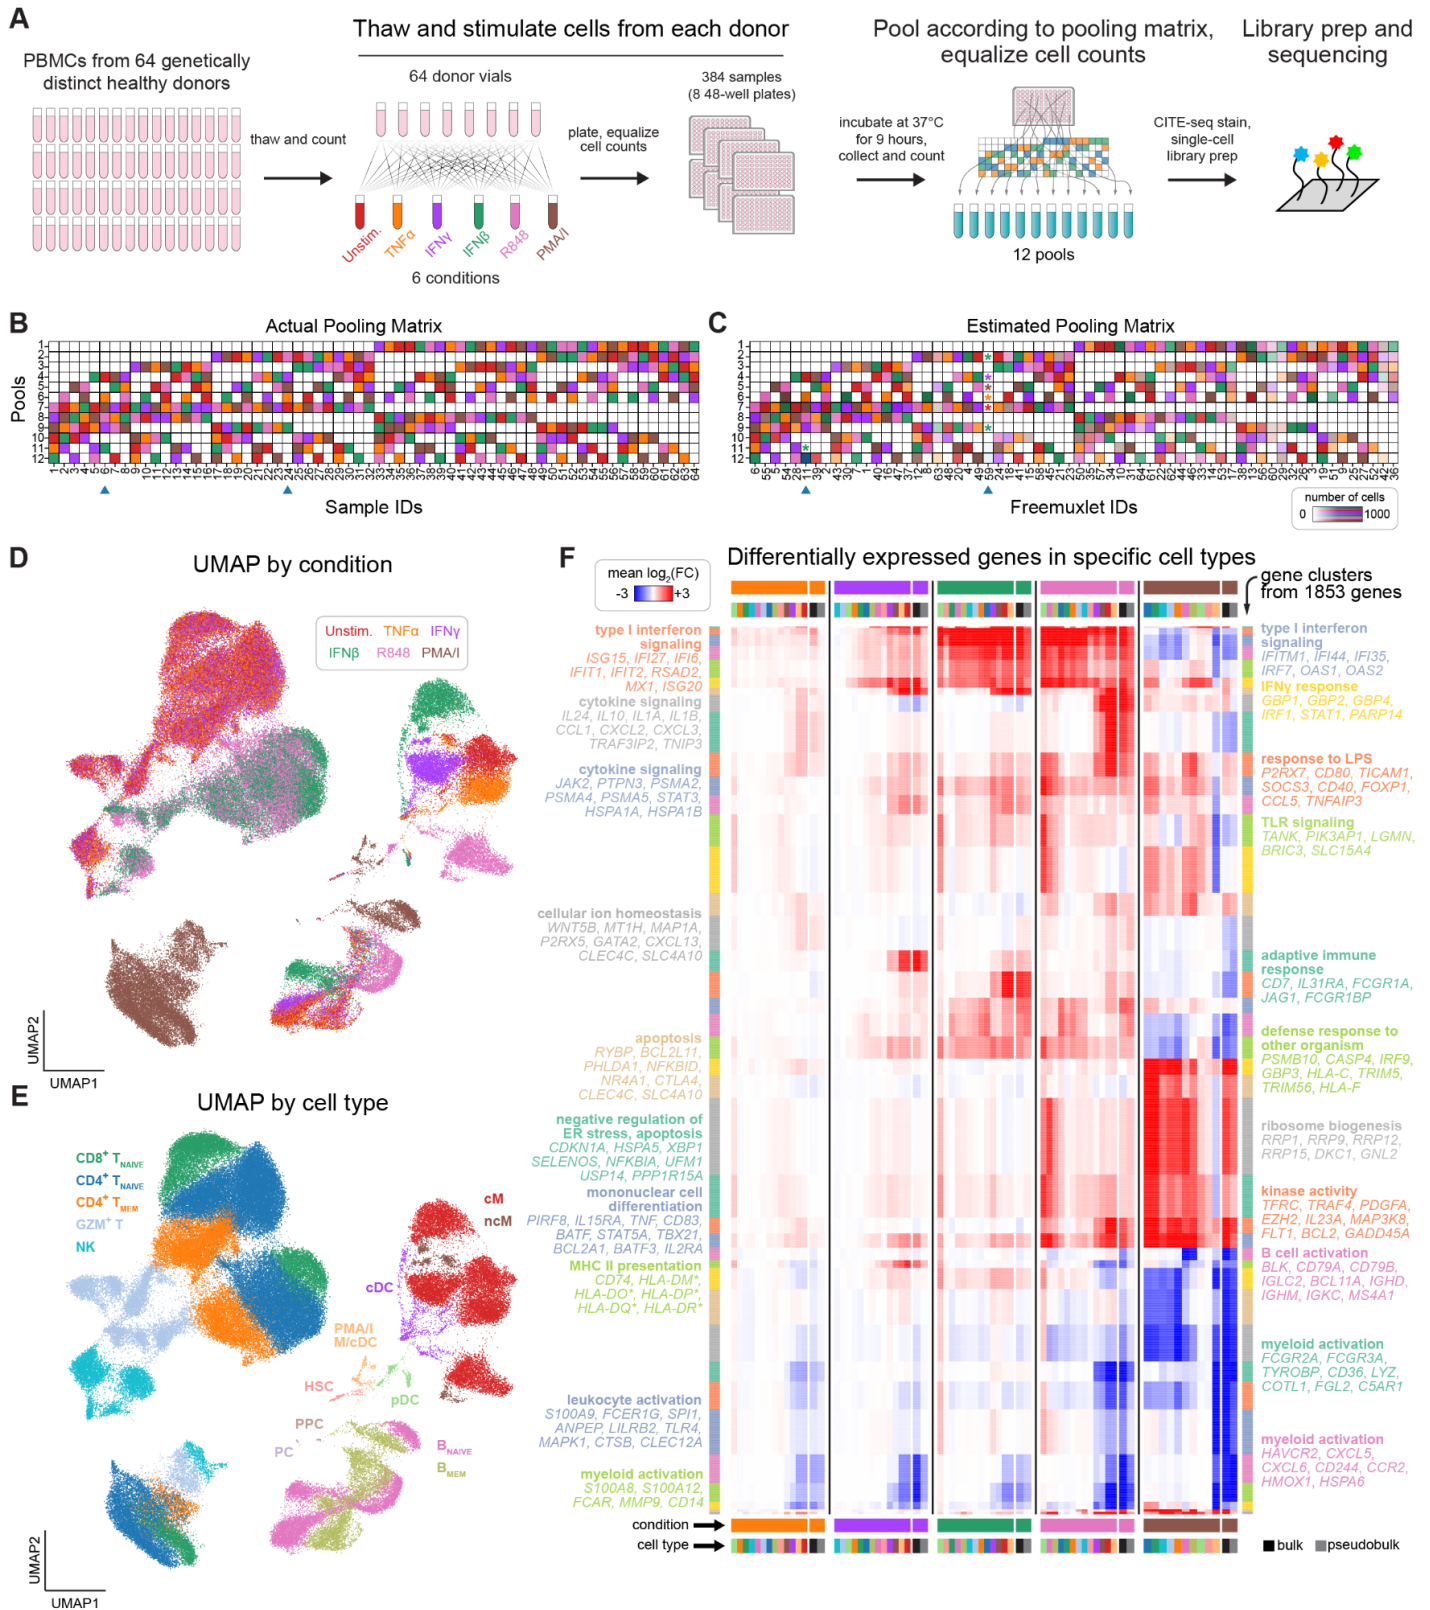

**Figure 3. The *clue* framework enables single-cell profiling of 384 samples in 12 reactions.** **A**, Experimental overview. PBMCs from 64 donors were incubated with 5 immunomodulatory stimulants for 9 hours, then pooled and sequenced. **B–C**, The actual pooling matrix and estimated pooling matrix from *freemuxlet* show near-perfect concordance. Two deviations (blue arrows), one mis-pooling event (genotype cluster 11) and one instance of cell loss (low recovery of a low viability sample, genotype cluster 59), are highlighted with asterisks. Demultiplexing was robust to these errors. **D–E**, Dimensionality reduction with UMAP and clustering with Leiden shows heterogeneity in gene expression from both stimulation condition (**D**) and cell type (**E**). **F**, Heatmap of differentially expressed genes comparing stimulation conditions to controls in each cell type. Genes are *k*-means clustered to yield gene modules with significant functional enrichment in immune-relevant biological pathways. Pseudobulks across all cell types per condition are concordant with bulk RNA data.

Figure 4

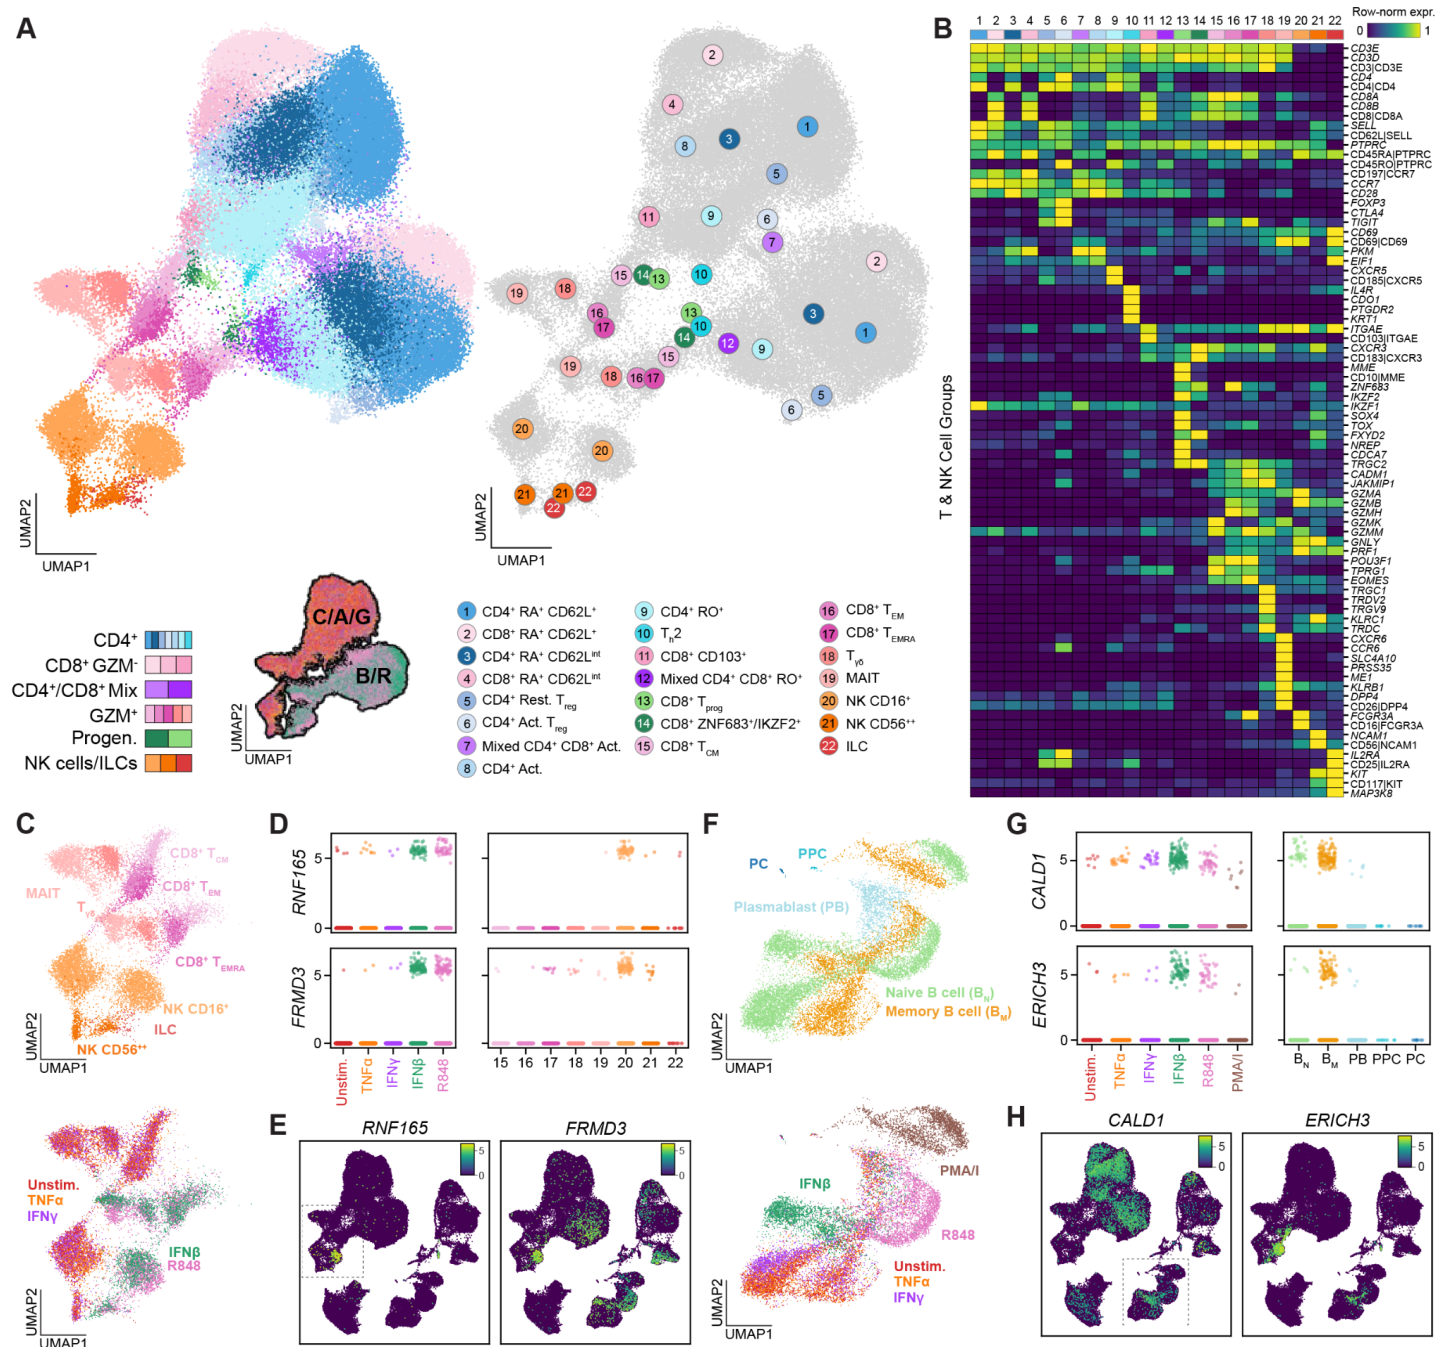

**Figure 4. Iterative clustering and less restrictive gene filtration enable high resolution cell type and cell state map.** **A**, Portion of UMAP showing T cells and NK cells, with identified cell groups colored and numbered. Insets show the location of particular cell groups and the condition overlays (C/A/G: Control, TNF $\alpha$ , IFN $\gamma$ ; B/R: IFN $\beta$ , R848). **B**, Row-normalized expression heatmap of selected genes used to identify subpopulations in **A**. **C**, Portion of UMAP showing Granzyme<sup>+</sup> (GZM<sup>+</sup>) T cell and NK cell subsets, colored by cell type (top) and condition (bottom). **D**, Expression of *RNF165* and *FRMD3*, genes expressed in both a cell type- and condition-specific manner. Plot restricted to CD16<sup>+</sup> NK cells and organized by condition (left) or restricted to IFN $\beta$  stimulation and organized by cell type (right). **E**, Full single-cell UMAP showing specific expression of *RNF165* and *FRMD3*. Dashed box indicates location of GZM<sup>+</sup> T and NK cells. **F**, Portion of UMAP showing B and plasma cells, colored by cell type and condition. **G**, Expression of *CALD1* and *ERICH3* as in **D**, for memory B cells by condition and IFN $\beta$ -stimulated cells by cell type. **H**, Full single-cell UMAP showing specific expression of *CALD1* and *ERICH3*.

Figure 5

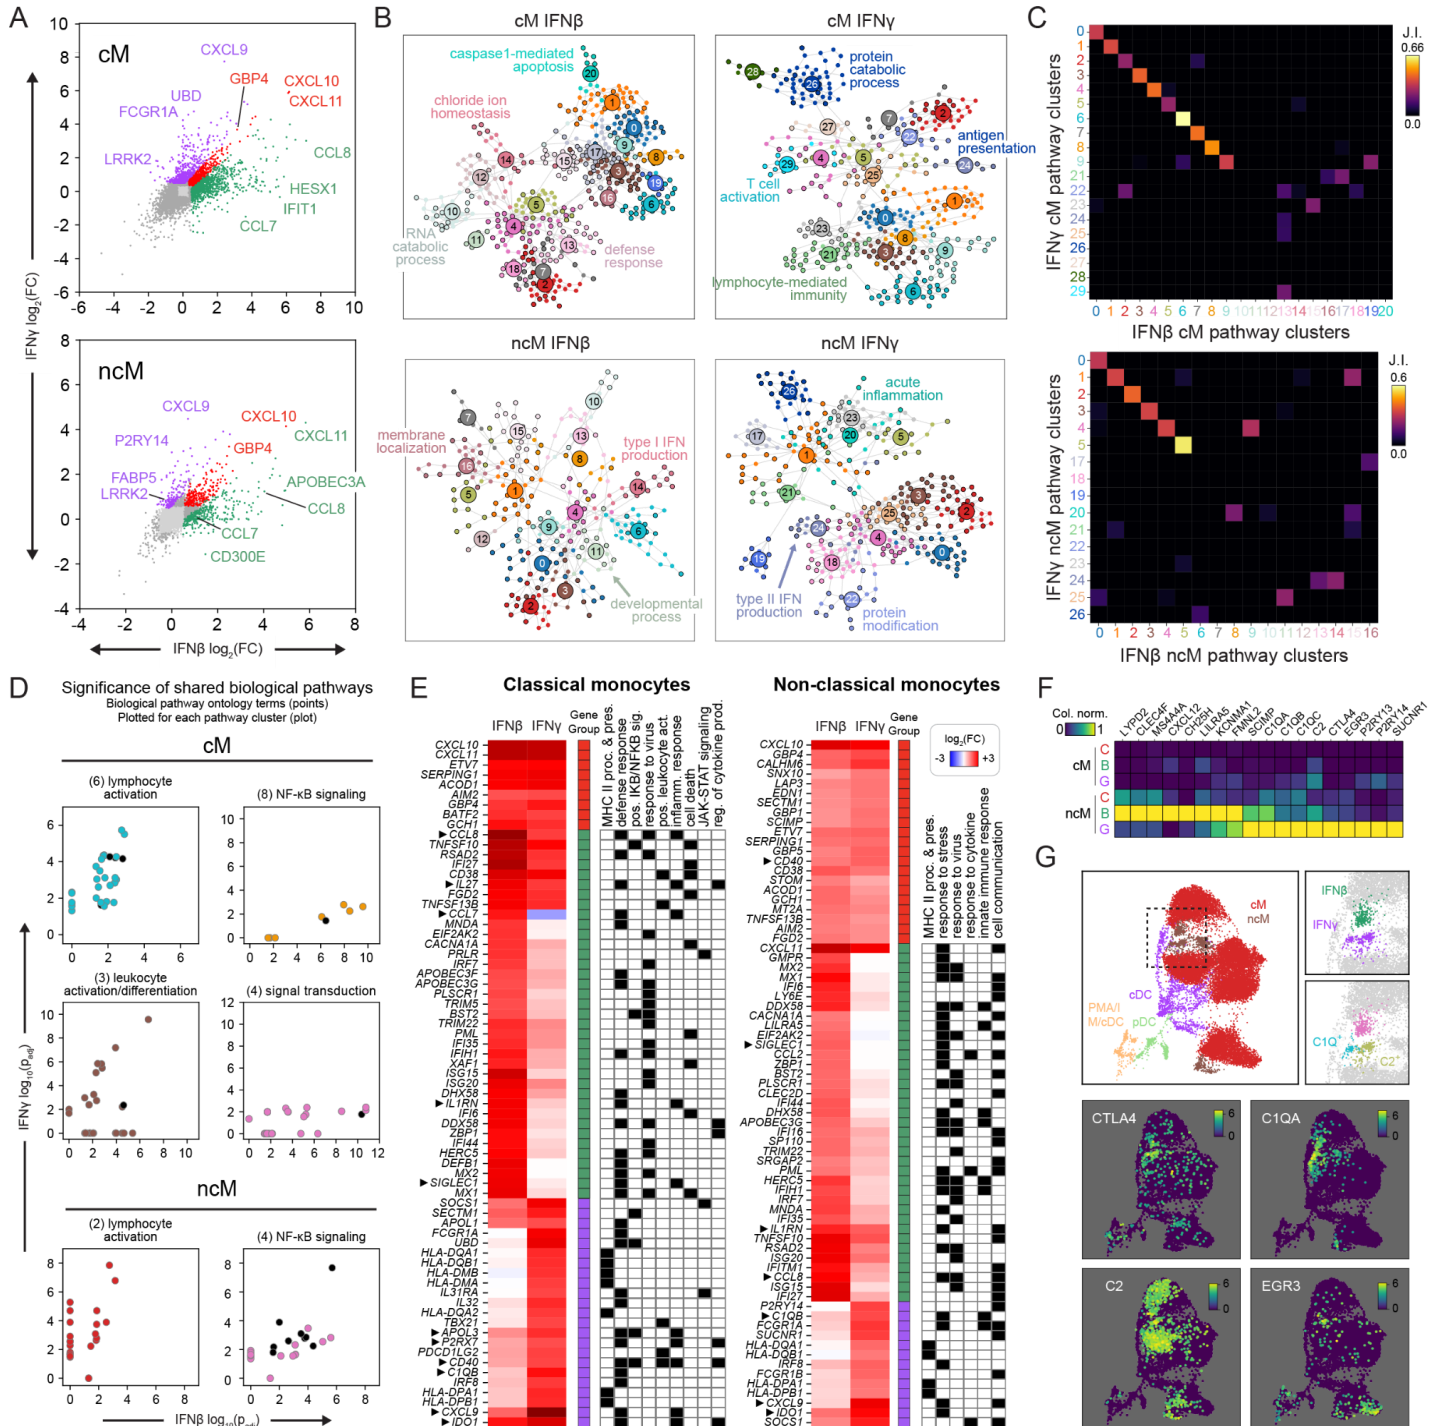

**Figure 5. IFNs induce shared and specific transcriptional effects in classical monocytes.** **A**,  $\log_2(\text{FC})$  of gene expression from control for each IFN in classical (cM) and non-classical (ncM) monocytes. Each gene is colored by its direction of change (shared upregulated, red; IFN $\gamma$  upregulated, purple; IFN $\beta$  upregulated, green). **B**, Graph of biological pathways enriched from upregulated genes for each cell type and IFN condition as determined by BiNGO. Each node is a gene ontology-enriched biological pathway term, and edges indicate shared enriched genes. Nodes are organized into "pathway clusters" via Leiden clustering using the adjacency matrix of shared genes. **C**, Jaccard index of terms between pathway clusters demonstrating some clusters are similar between the IFNs, and others are specific to either IFN. **D**, Significance ( $-\log_{10}(p_{\text{adj}})$ ) of enriched terms comprising various shared pathway clusters in cMs (top 4 plots) and ncMs (bottom 2 plots). Unenriched terms in a given IFN have a significance set to 0. Terms are colored by their pathway cluster (title of each plot) as shown in B – C, unless they clustered differently between the IFNs, in which case they are colored black. **E**, Heatmap of  $\log_2(\text{FC})$  for the most differentially expressed genes, organized according to direction of change as shown in **A**. Genes specific to either IFN enriched in various ontology terms are annotated with a binary matrix. **F–G**, Column-normalized heatmap and portions of UMAP showing expression of genes upregulated in IFN-stimulated non-classical monocytes.

Figure 6

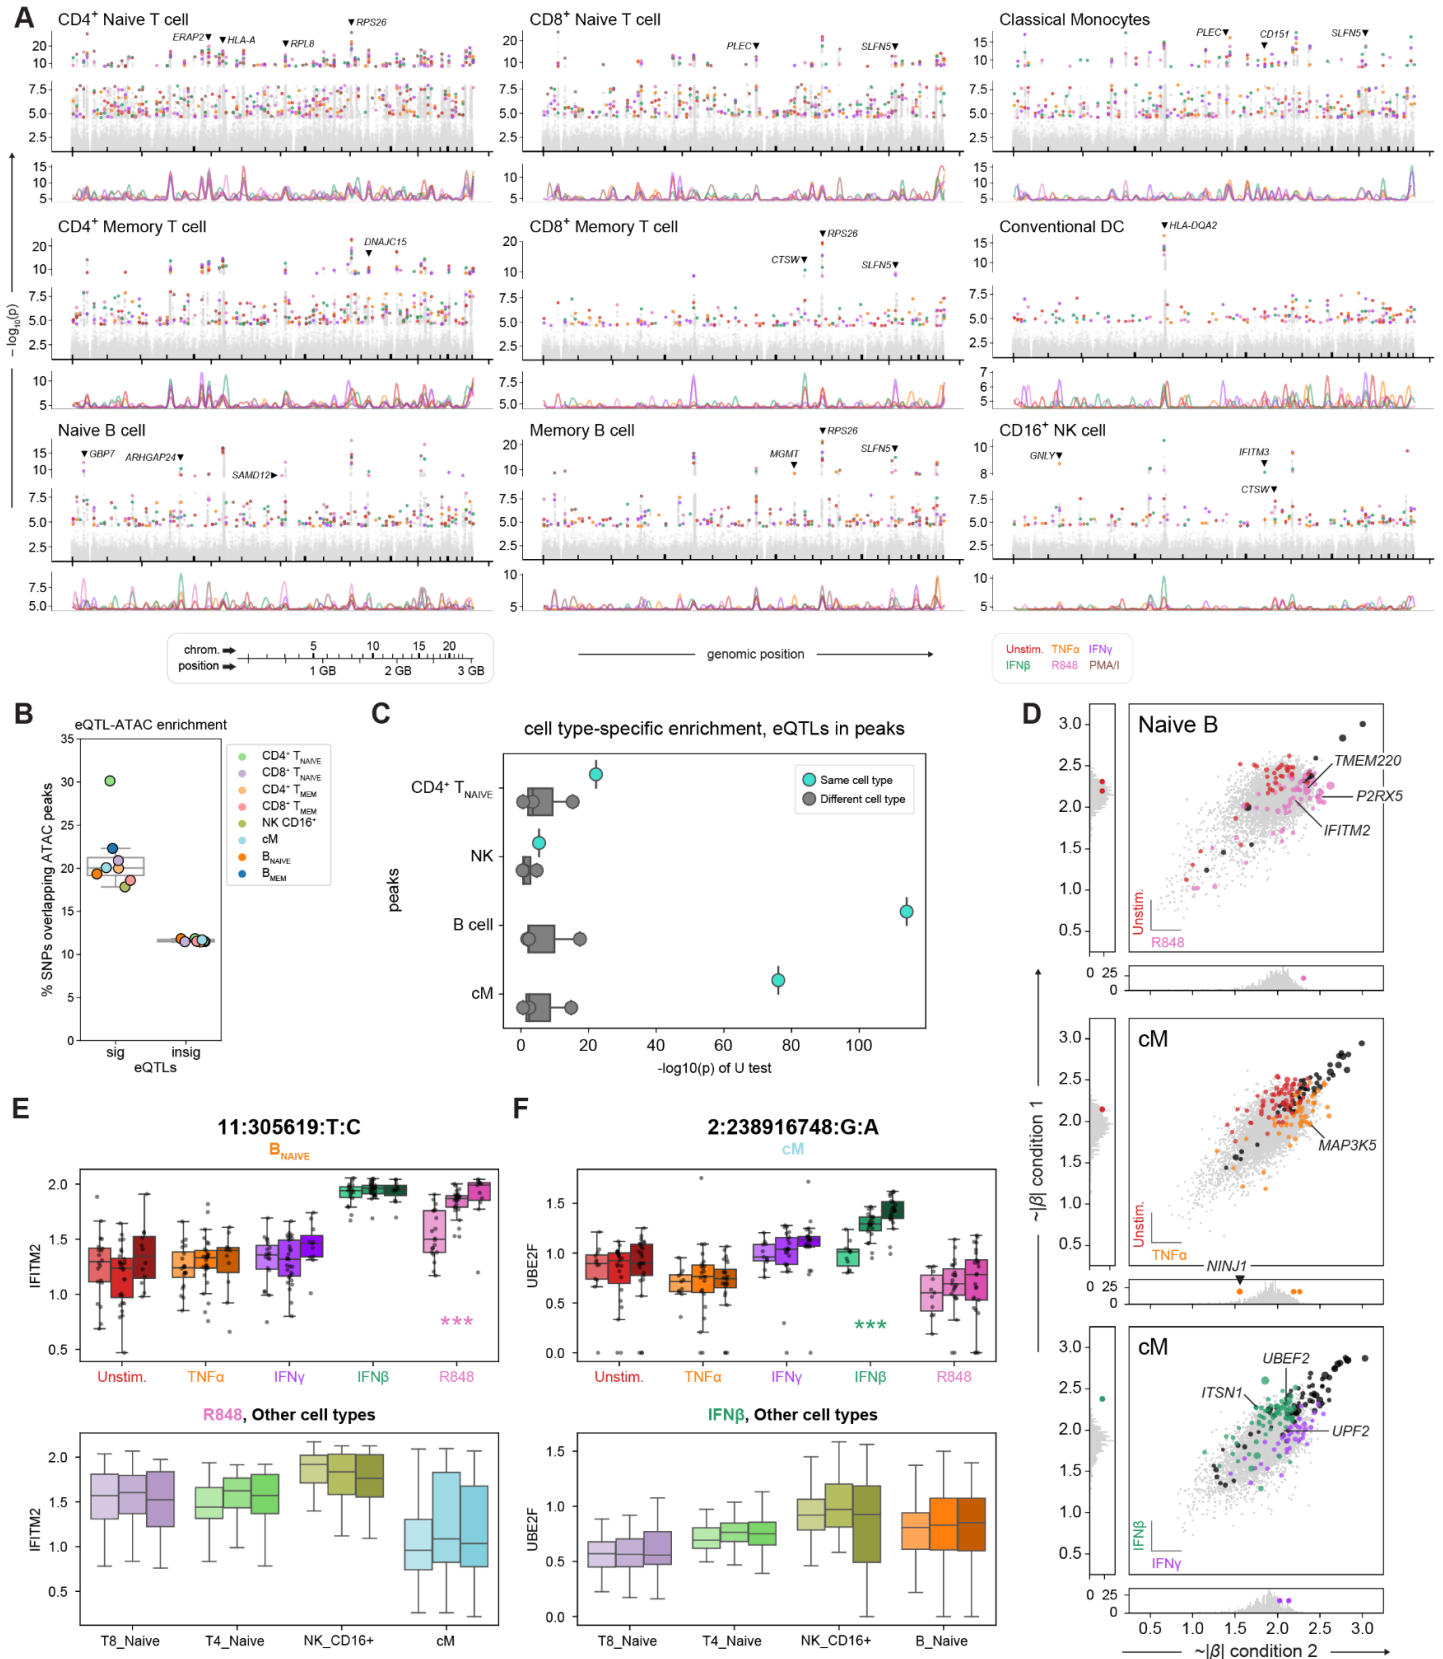



**Figure 6. Genetic variants influence gene expression in a cell type- and condition-specific manner.** **A**, Genome-wide Manhattan plots for selected cell types. All SNPs are colored gray and significant hits are colored by condition. Below each scatter plot is a line plot showing relative enrichment using a moving window average (see Methods). **B–C**, Enrichment of eQTLs in ATAC peaks, called on all unstimulated cells together (**B**) and in a cell type-specific manner (**C**, column-normalized). **D**, Comparisons of effect sizes of eQTLs between conditions in selected cell types. Significant eQTLs in either condition are colored by condition, and colored black if significant in both. SNPs that were insignificant but reported in both conditions are plotted in the main plot, colored gray. SNPs for which effect sizes were not reported in one or the other condition are plotted in the marginal distributions. **E–F**, Box plots showing eQTLs observed in a combination of cell type and condition, plotting gene expression with genotype (homozygous reference → heterozygous → homozygous alternate). Top plots show expression levels by condition in the given cell type. Bottom plots show expression levels by cell type in the given condition. Box plots showing a significant correlation (BH < 0.001) are noted with \*\*\*.
